# Supplementary material
Source: HighWire-hosted journal article supplement (https://erj.ersjournals.com/content/56/5/2002425)
Supplement: inline-supplementary-material-1 [file inline-supplementary-material-1.pdf]

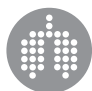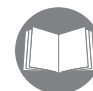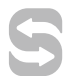

SHAREABLE PDF

# PILOTing towards a RAPID predictor of mortality for infectious pleural effusions

José M. Porcel 

**Affiliation:** Pleural Medicine Unit, Dept of Internal Medicine, Arnau de Vilanova University Hospital, IRBLleida, University of Lleida, Lleida, Spain.

**Correspondence:** José M. Porcel, Pleural Medicine Unit, Dept of Internal Medicine, Arnau de Vilanova University Hospital, Avda Alcalde Rovira Roure 80, 25198 Lleida, Spain. E-mail: jporcelp@yahoo.es

 @ERSpublications

The RAPID score can estimate short-term mortality in patients with pleural infections and should be considered the “gold standard” for outcomes assessment in this population <https://bit.ly/31XctMK>

**Cite this article as:** Porcel JM. PILOTing towards a RAPID predictor of mortality for infectious pleural effusions. *Eur Respir J* 2020; 56: 2002425 [<https://doi.org/10.1183/13993003.02425-2020>].

This single-page version can be shared freely online.

Depending on the imaging modality used, between 19% (with chest radiographs) [1] and 54% (with ultrasound) [2] of patients with community-acquired pneumonia have an accompanying pleural effusion. Most previous studies on parapneumonic effusions have focused on the necessity of fluid drainage [3, 4], with less attention being paid to the prognostic aspects. However, pleural infection (a term indistinctly used for parapneumonic effusions and empyemas) remains a serious condition associated with significant healthcare resource utilisation that portends a non-negligible mortality. In a large Danish registry of 6878 hospitalised patients with empyema the crude 30-day mortality was about 10%, though it ranged from 1.2% in those younger than 40 years to 20.2% in those aged  $\geq 80$  years [5]. Supportively, in two large series of patients with pleural infections, the reported 30-day mortality rate was roughly 14% [6, 7]. Generally, figures for long-term prognosis are worse, with an observed 3-month and 1-year mortality of 23% and 42%, respectively, in an Australian series of 561 adults with culture-positive pleural infections, two-thirds of which were hospital-acquired [8]. Moreover, a recent systematic review totalling 227 898 patients with pleural infections found the median prevalence of pre-existing comorbidities (mainly respiratory and cardiac diseases) to be as high as 72%, while the median length of hospital stay was 19 days [9].

Conflict of interest: J.M. Porcel has nothing to disclose.

## References

- 1 Falguera M, Carratalà J, Bielsa S, *et al*. Predictive factors, microbiology and outcome of patients with parapneumonic effusion. *Eur Respir J* 2011; 38: 1173–1179.
- 2 Reissig A, Copetti R, Mathis G, *et al*. Lung ultrasound in the diagnosis and follow-up of community-acquired pneumonia: a prospective, multicenter, diagnostic accuracy study. *Chest* 2012; 142: 965–972.
- 3 Porcel JM. Distinguishing complicated from uncomplicated parapneumonic effusions. *Curr Opin Pulm Med* 2015; 21: 346–351.
- 4 Porcel JM, Valencia H, Bielsa S. Factors influencing pleural drainage in parapneumonic effusions. *Rev Clin Esp* 2016; 216: 361–366.
- 5 Søgaard M, Nielsen RB, Nørgaard M, *et al*. Incidence, length of stay, and prognosis of hospitalized patients with pleural empyema: a 15-year Danish nationwide cohort study. *Chest* 2014; 145: 189–192.
- 6 Park CK, Oh HJ, Choi HY, *et al*. Microbiological characteristics and predictive factors for mortality in pleural infection: a single-center cohort study in Korea. *PLoS One* 2016; 11: e0161280.
- 7 Dean NC, Griffith PP, Sorensen JS, *et al*. Pleural effusions at first ED encounter predict worse clinical outcomes in patients with pneumonia. *Chest* 2016; 149: 1509–1515.

- 8 Brims F, Popowicz N, Rosenstengel A, *et al.* Bacteriology and clinical outcomes of patients with culture-positive pleural infection in Western Australia: a 6-year analysis. *Respirology* 2019; 24: 171–178.
- 9 Cargill TN, Hassan M, Corcoran JP, *et al.* A systematic review of comorbidities and outcomes of adult patients with pleural infection. *Eur Respir J* 2019; 54: 1900541.
- 10 Metlay JP, Waterer GW, Long AC, *et al.* Diagnosis and treatment of adults with community-acquired pneumonia. An official clinical practice guideline of the American Thoracic Society and Infectious Diseases Society of America. *Am J Respir Crit Care Med* 2019; 200: e45–e67.
- 11 Zhang ZX, Yong Y, Tan WC, *et al.* Prognostic factors for mortality due to pneumonia among adults from different age groups in Singapore and mortality predictions based on PSI and CURB-65. *Singapore Med J* 2018; 59: 190–198.
- 12 Rahman NM, Kahan BC, Miller RF, *et al.* A clinical score (RAPID) to identify those at risk for poor outcome at presentation in patients with pleural infection. *Chest* 2014; 145: 848–855.
- 13 Maskell NA, Davies CW, Nunn AJ, *et al.* UK controlled trial of intrapleural streptokinase for pleural infection. *N Engl J Med* 2005; 352: 865–874.
- 14 Rahman NM, Maskell NA, West A, *et al.* Intrapleural use of tissue plasminogen activator and DNase in pleural infection. *N Engl J Med* 2011; 365: 518–526.
- 15 White HD, Henry C, Stock EM, *et al.* Predicting long-term outcomes in pleural infections. RAPID score for risk stratification. *Ann Am Thorac Soc* 2015; 12: 1310–1316.
- 16 Wong D, Yap E. Pleural infection in a New Zealand centre: high incidence in Pacific people and RAPID score as a prognostic tool. *Intern Med J* 2016; 46: 703–709.
- 17 Touray S, Sood RN, Lindstrom D, *et al.* Risk stratification in patients with complicated parapneumonic effusions and empyema using the RAPID score. *Lung* 2018; 196: 623–629.
- 18 Yamazaki A, Ito A, Ishida T, *et al.* Polymicrobial etiology as a prognostic factor for empyema in addition to the renal, age, purulence, infection source, and dietary factors score. *Respir Investig* 2019; 57: 574–581.
- 19 Corcoran JP, Psallidas I, Gerry S, *et al.* Prospective validation of the RAPID clinical risk prediction score in adult patients with pleural infection: the PILOT study. *Eur Respir J* 2020; 56: 2000130.
- 20 Cook NR. Use and misuse of the receiver operating characteristic curve in risk prediction. *Circulation* 2007; 115: 928–935.
- 21 Porcel JM, Ferreiro L, Rami L, *et al.* Two vs. three weeks of treatment with amoxicilline-clavulanate for stabilized community-acquired complicated parapneumonic effusions. A preliminary non-inferiority, double-blind, randomized, controlled trial. *Pleura Peritoneum* 2020; 5: 20190027.
- 22 Porcel JM. Dual intracavitary therapy for pleural infections: leaving reluctance behind. *Eur Respir J* 2019; 54: 1901001.
